# Supplementary material for: Mechanistic insights into a NOx storage-reduction (NSR) catalyst by spatiotemporal operando X-ray absorption spectroscopy
Source: Royal Society of Chemistry journal article supplement (doi:10.1039/c9cy00176j), 2019-01-01
Supplement: c9cy00176j1.pdf [file c9cy00176j1.pdf]

Electronic Supplementary Information (ESI)

**Mechanistic insights into NO<sub>x</sub> storage-reduction (NSR) catalyst  
by spatiotemporal *operando* X-ray absorption spectroscopy**

Yasutaka Nagai,<sup>\*a</sup> Akihiko Kato,<sup>a</sup> Masaoki Iwasaki<sup>a</sup> and Keisuke Kishita<sup>b</sup>

<sup>a</sup>*Toyota Central R&D Labs., Inc., Nagakute, Aichi 480-1192, Japan. E-mail: e1062@mosk.tytlabs.co.jp*

<sup>b</sup>*Toyota Motor Corporation, Toyota, Aichi 471-8572, Japan*

## Table of Contents

### Experimental Procedures

**Table S1:** Experimental sequence of the spatiotemporal *operando* XAS.

**Figure S1:** Schematic illustration of automotive catalytic converter and the NO<sub>x</sub> storage and reduction (NSR) mechanism.

**Figure S2:** Experimental set-up for *operando* XAS in transition mode at Toyota beamline (BL33XU, SPring-8) and quick gas changing from a lean (oxidative) to rich (reductive) atmosphere.

**Figure S3:** Calculation method of Rh reduction time.

**Figure S4:** Temporal dependence of the Rh metal fraction in the Rh/Ba/Al<sub>2</sub>O<sub>3</sub> catalyst from lean to rich condition.

**Figure S5:** Schematic illustration of Rh reduction time for Rh/BaO/Al<sub>2</sub>O<sub>3</sub> catalyst with or without stored NO<sub>x</sub>.

**Figure S6:** Schematic illustration of NO<sub>x</sub> storage and reduction behavior for the 100% NO<sub>x</sub> storage.

**Figure S7:** Schematic illustration of NO<sub>x</sub> storage and reduction behavior for the 33% NO<sub>x</sub> storage.

## Experimental Procedures

### *Catalyst preparation*

0.5 wt% Rh/BaO (10 wt% as Ba)/ $\gamma$ -Al<sub>2</sub>O<sub>3</sub> catalyst was prepared in the following two steps. First, the Rh/ $\gamma$ -Al<sub>2</sub>O<sub>3</sub> catalysts were prepared by incipient wet impregnation of the aqueous solution of  $\gamma$ -Al<sub>2</sub>O<sub>3</sub> (185 m<sup>2</sup>/g) powder with a Rh precursor (Rhodium nitrate). The impregnated powders were dried overnight at 110 °C and calcined at 500 °C for 3 h in air. Second, the obtained sample was impregnated with an aqueous solution of a barium precursor (Barium acetate), followed by calcination at 500 °C for 3h to obtain the Rh/BaO/ $\gamma$ -Al<sub>2</sub>O<sub>3</sub> catalyst. The catalysts for *operando* XAS measurement were pressed into disks and pulverized to 75 – 150  $\mu$ m size.

### *Spatiotemporal operando XAS measurement*

The *operando* XAS experiments were performed at the Toyota beamline (BL33XU) of SPring-8, Japan. As shown in Fig. 1a, 66 mg of pellet catalyst (sieve fraction 75 – 150  $\mu$ m) was placed in a quartz capillary tube, and the length of the catalyst bed was ca. 8 mm. The capillary tube with the pellet catalyst was set in a spatial *operando* cell (Fig. 1b). The cell was designed for transition X-ray detection at high sample temperatures ( $T_{\max}$  ~800 °C), while minimizing dead volume. In order to measure the XAS spectra at each point in the axial direction of the catalyst bed, a window for X-ray transition, which is located between the upper and lower heating furnace, is provided in the cell. The diameter of the X-ray beam was about 0.5 mm  $\times$  0.5 mm. The NSR reaction was operated at 450 °C, and a lean stream (oxygen excess) consisting of 0% or 0.07% NO, 7% O<sub>2</sub>, and He balance was introduced into the cell for 300 or 60 s, followed by a rich stream of 3% H<sub>2</sub> and He balance for 240 s. The gas flow rates of the lean and rich streams were both 100 cc/min. A time for the gas flow to pass through the catalyst bed is 60 ms. Outlet gas was monitored by a quadrupole mass analyzer. H<sub>2</sub> ( $m/z$  2), N<sub>2</sub> ( $m/z$  28), NO ( $m/z$  30), and N<sub>2</sub>O ( $m/z$  44) were measured every 150 ms. H<sub>2</sub>O ( $m/z$  18), NH<sub>3</sub> and a fragment of H<sub>2</sub>O ( $m/z$  17) were also measured every ca. 1.2 s. The gas flowing over the sample was quickly changed from a lean to a rich atmosphere using a gas-actuated switching valve (Fig. S2†). Measurement of inlet/outlet NO concentration confirmed that the amount of the stored NO<sub>x</sub> during the lean 60 s supply with 0.07% NO corresponded to 0.050 mmol/g-catalyst (33% of the saturated NO<sub>x</sub> storage amount) and that during the lean 300 s with 0.07% NO and 0 % NO corresponded to 0.151 mmol/g-catalyst (100% NO<sub>x</sub> storage amount) and 0 mmol/g-catalyst (0% NO<sub>x</sub> storage amount), respectively.

Under the NSR operation, along with the on-line mass spectra of the outlet gas species, Rh *K*-edge XAS spectra were recorded at four positions: 1 (A), 3 (B), 5 (C) and 7 (D) millimeters from the bed front (Fig. 1a). The detailed experimental sequences for spatiotemporal *operando* XAS measurement are described in Table S1†. After the pre-treatment to refresh the nitrate and carbonate species in the entire catalyst, the X-ray beam (0.5 mm  $\times$  0.5 mm) was set at position A, and the XAS and mass spectra were measured during the NSR operation from lean to rich conditions. The same process as the above including the pre-treatment and NSR operation was also performed at each position of B, C and D. All sequences including the X-ray position, gas condition, XAS measurement, and mass measurement were fully automated. The time axis of the XAS and mass measurements was controlled by a

trigger signal. The series of 1 – 8 sequences was repeated three times, and the reproducibility of the XAS and mass data was confirmed.

The Rh *K*-edge X-ray absorption near-edge structure (XANES) spectra were collected every 100 ms. High-quality data from Rh *K*-edge XANES spectra were acquired using QXAS in transmission mode. The incident X-ray was monochromatized by using a servo-motor-driven Si channel-cut monochromator having a Si(220) crystal for the Rh *K*-edge (23.23 keV). The energy was calibrated so that the absorption edge energy for the standard (Rh foil) would be 23.23 keV. A measured XANES spectrum was normalized in the following manner. A pre-edge background was estimated by fitting in the pre-edge region to the Victoreen formula. The fitted pre-edge background was extrapolated and subtracted from the entire range of a spectrum. The background above the edge was also obtained by fitting to the Victoreen formula in the same manner as above mentioned. Normalization of an XANES spectrum was then performed so that this background curve would become one in the post-edge region.

The Rh metal fraction was evaluated by the normalized Rh *K*-edge XANES spectra of the sample using a linear combination fit with the reference spectra of Rh foil and Rh<sub>2</sub>O<sub>3</sub> powder. The Rh reduction time, which denotes to the time for the Rh species in the Rh/BaO/Al<sub>2</sub>O<sub>3</sub> catalyst to be completely reduced from Rh oxide (Rh<sub>2</sub>O<sub>3</sub>) to Rh metal, was estimated in the following. Rh reduction onset time (*t*<sub>1</sub>) and Rh reduction termination time (*t*<sub>2</sub>) were obtained by linear fitting of the variation of the Rh metal fraction (Fig. S3†). The value obtained by subtracting *t*<sub>1</sub> from *t*<sub>2</sub> was defined as Rh reduction time.

**Table S1:** Experimental sequence of the spatiotemporal *operando* XAS.

| Sequence No.                                  | X-ray position | Gas condition                                                                                             | Cell temperature | Rh K-edge XAS measurement | Mass measurement of outlet gas |
|-----------------------------------------------|----------------|-----------------------------------------------------------------------------------------------------------|------------------|---------------------------|--------------------------------|
| 1                                             | A              | Pre-treatment:<br>3% H <sub>2</sub> /He (240 s) ↔<br>7% O <sub>2</sub> /He (240 s) cycling (2 times)      |                  | -                         | -                              |
| 2                                             | A              | Lean to Rich:<br>0% or 0.07% NO +7% O <sub>2</sub> /He (300 s or 60 s)<br>→ 3% H <sub>2</sub> /He (240 s) |                  | ✓                         | ✓                              |
| 3                                             | B              | Pre-treatment:<br>3% H <sub>2</sub> /He (240 s) ↔<br>7% O <sub>2</sub> /He (240 s) cycling (2 times)      |                  | -                         | -                              |
| 4                                             | B              | Lean to Rich:<br>0% or 0.07% NO +7% O <sub>2</sub> /He (300 s or 60 s)<br>→ 3% H <sub>2</sub> /He (240 s) | 450 °C           | ✓                         | ✓                              |
| 5                                             | C              | Pre-treatment:<br>3% H <sub>2</sub> /He (240 s) ↔<br>7% O <sub>2</sub> /He (240 s) cycling (2 times)      |                  | -                         | -                              |
| 6                                             | C              | Lean to Rich:<br>0% or 0.07% NO +7% O <sub>2</sub> /He (300 s or 60 s)<br>→ 3% H <sub>2</sub> /He (240 s) |                  | ✓                         | ✓                              |
| 7                                             | D              | Pre-treatment:<br>3% H <sub>2</sub> /He (240 s) ↔<br>7% O <sub>2</sub> /He (240 s) cycling (2 times)      |                  | -                         | -                              |
| 8                                             | D              | Lean to Rich:<br>0% or 0.07% NO +7% O <sub>2</sub> /He (300 s or 60 s)<br>→ 3% H <sub>2</sub> /He (240 s) |                  | ✓                         | ✓                              |
| Repeat the series of 1 – 8 sequences, 3 times |                |                                                                                                           |                  |                           |                                |

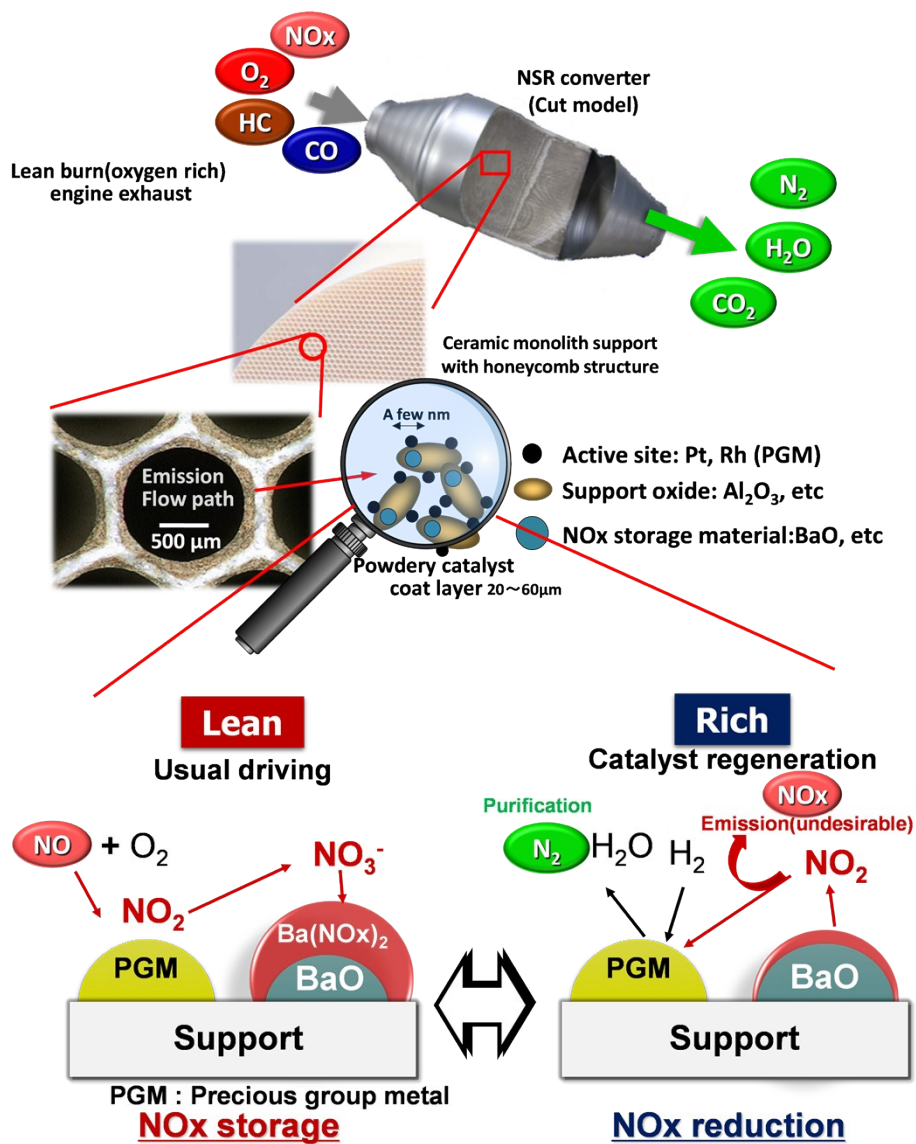

**Figure S1:** Schematic illustration of automotive catalytic converter and the NOx storage and reduction (NSR) mechanism.

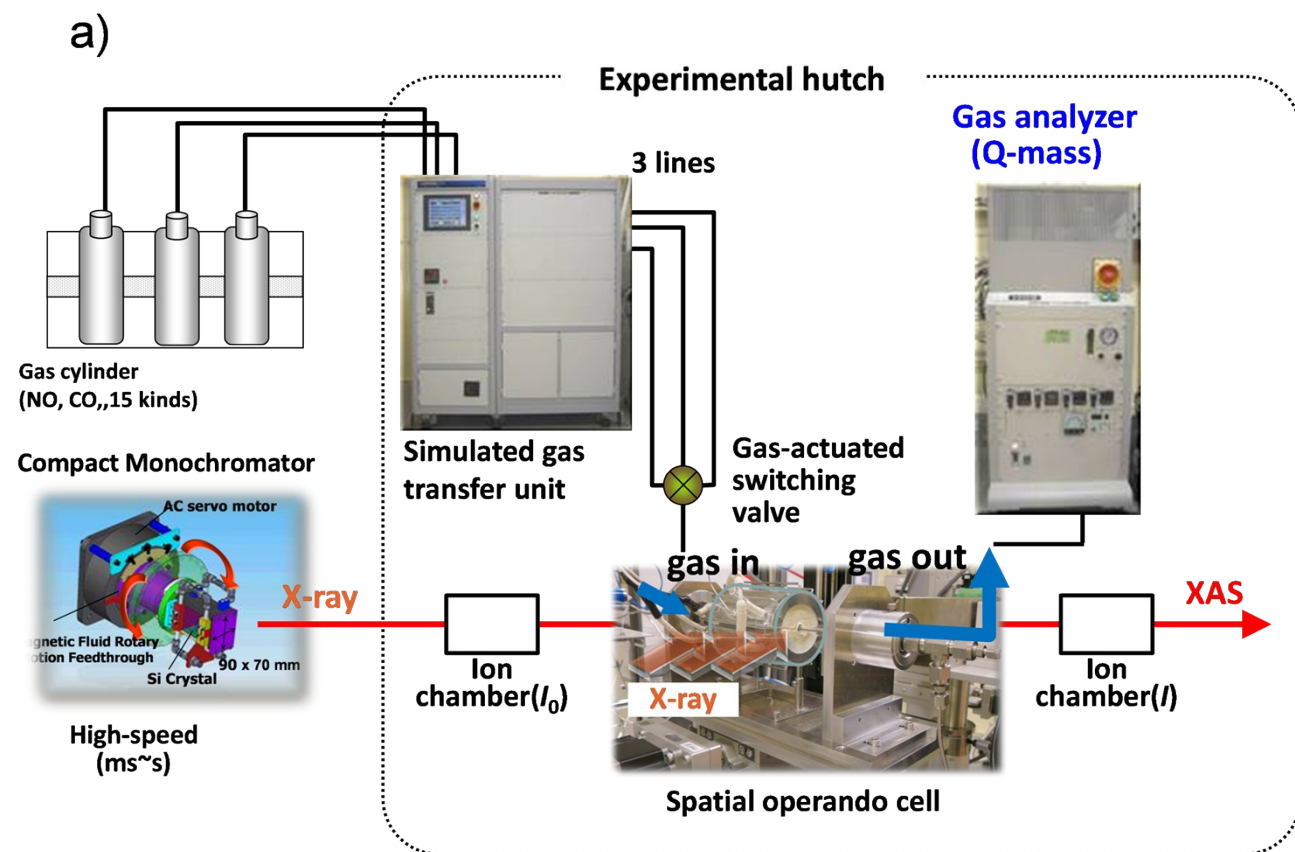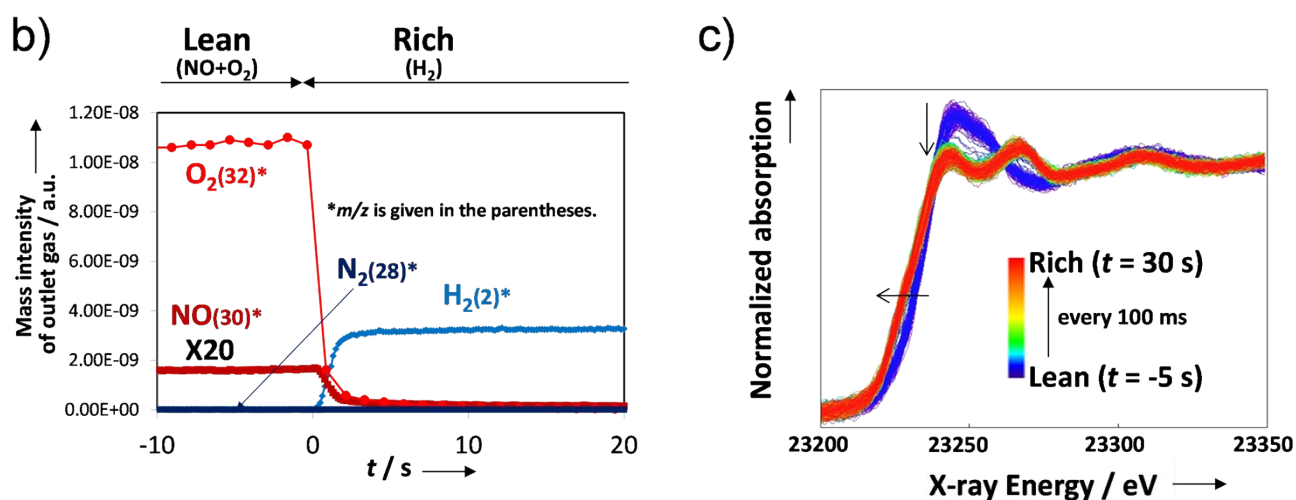

**Figure S2:** a) Experimental set-up for operando XAS in transition mode at Toyota beamline (BL33XU, SPring-8). b) Quick gas changing from a lean (oxidative) to rich (reductive) atmosphere. Variations in the detected ion current in blank test. The ion current of  $m/z$  2 (H<sub>2</sub>),  $m/z$  28 (N<sub>2</sub>),  $m/z$  30 (NO) and  $m/z$  32 (O<sub>2</sub>). c) Serial time-resolved Rh *K*-edge XANES spectra of Rh/BaO/Al<sub>2</sub>O<sub>3</sub> under the lean to rich condition.

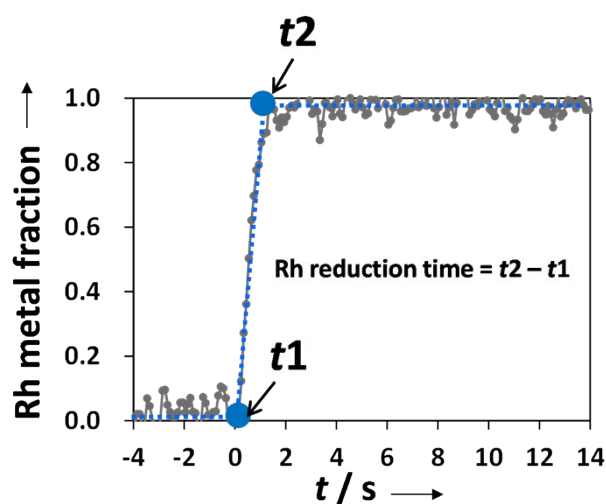

**Figure S3:** Calculation method of Rh reduction time. Rh reduction start time ( $t_1$ ) and Rh reduction end time ( $t_2$ ) were obtained by linear fitting of the variation of the Rh metal fraction. The value obtained by subtracting  $t_1$  from  $t_2$  was defined as Rh reduction time.

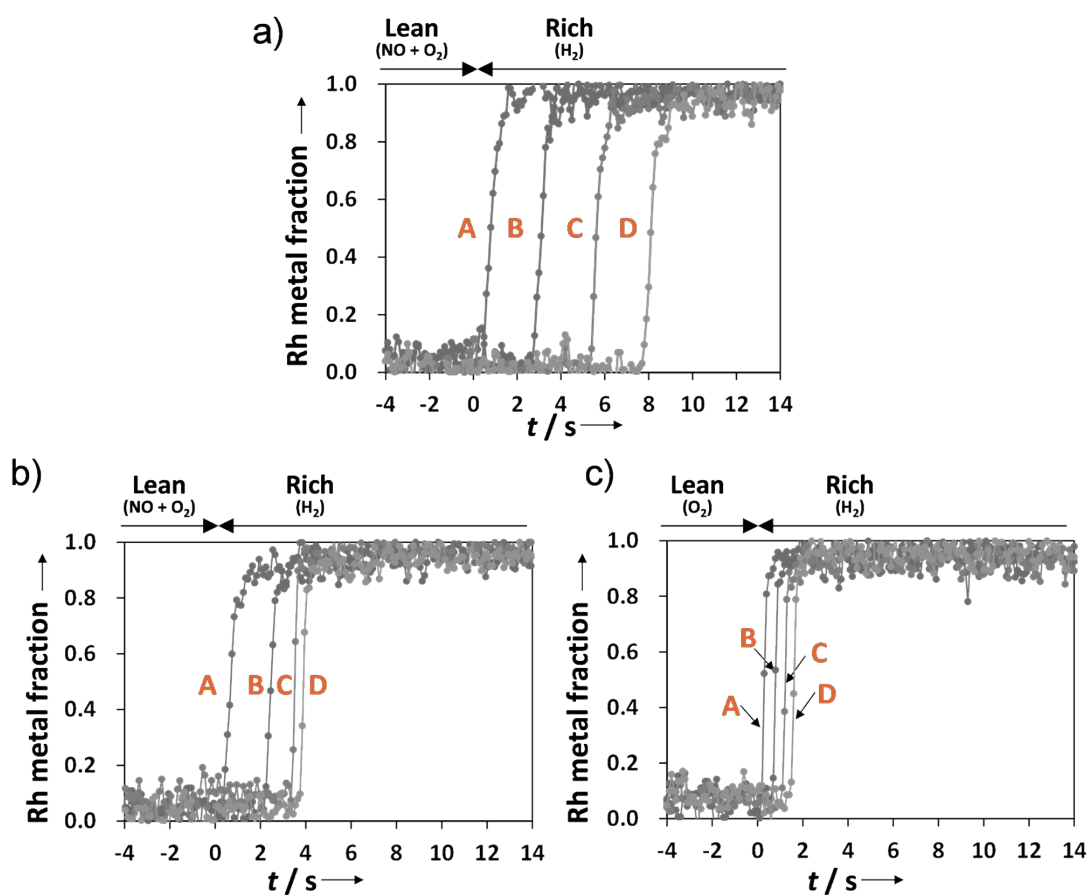

**Figure S4:** Temporal dependence of the Rh metal fraction in the Rh/BaO/Al<sub>2</sub>O<sub>3</sub> catalyst from lean to rich condition. a) 100% NO<sub>x</sub> storage, b) 33% NO<sub>x</sub> storage, c) 0% NO<sub>x</sub> storage. The Rh metal fraction was evaluated by the Rh *K*-edge XAS spectra of the sample using a linear combination fit with the reference spectra of Rh foil and Rh<sub>2</sub>O<sub>3</sub> powder.



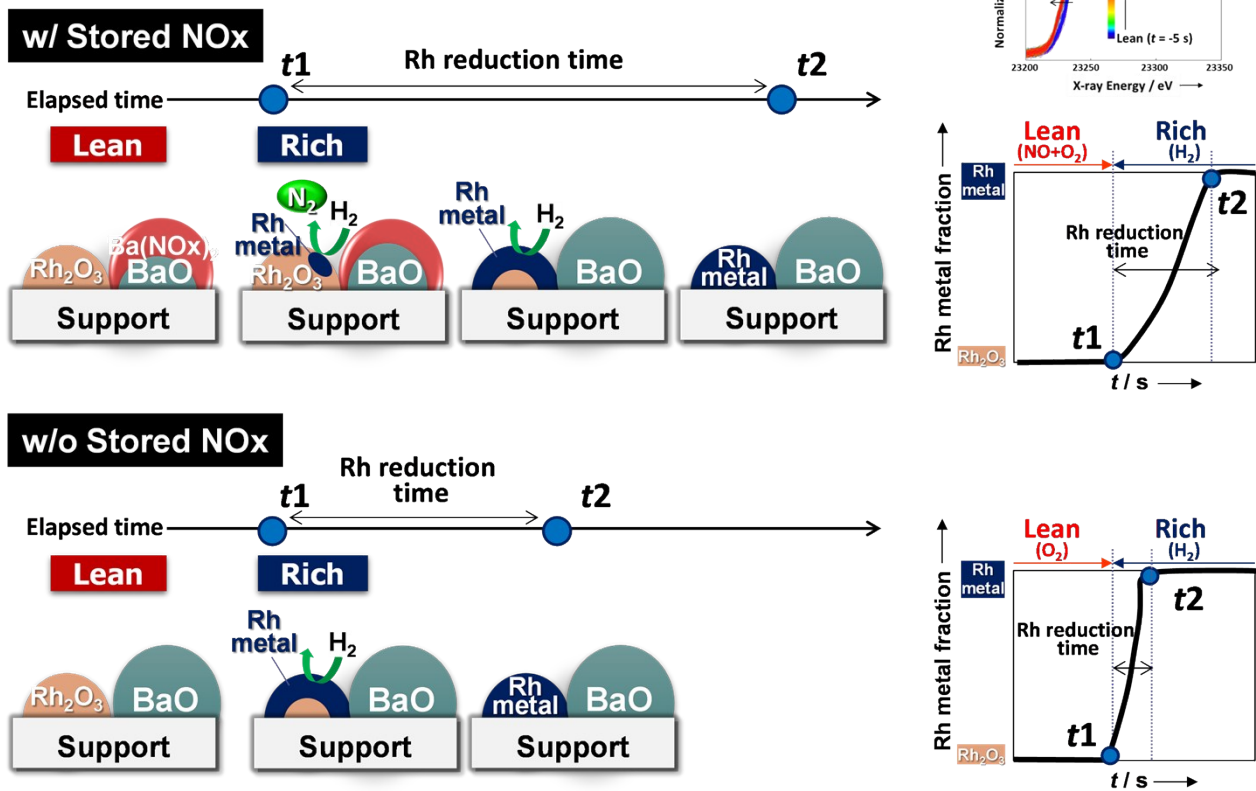

**Figure S5:** Schematic illustration of Rh reduction time for Rh/BaO/Al<sub>2</sub>O<sub>3</sub> catalyst with or without stored NOx.

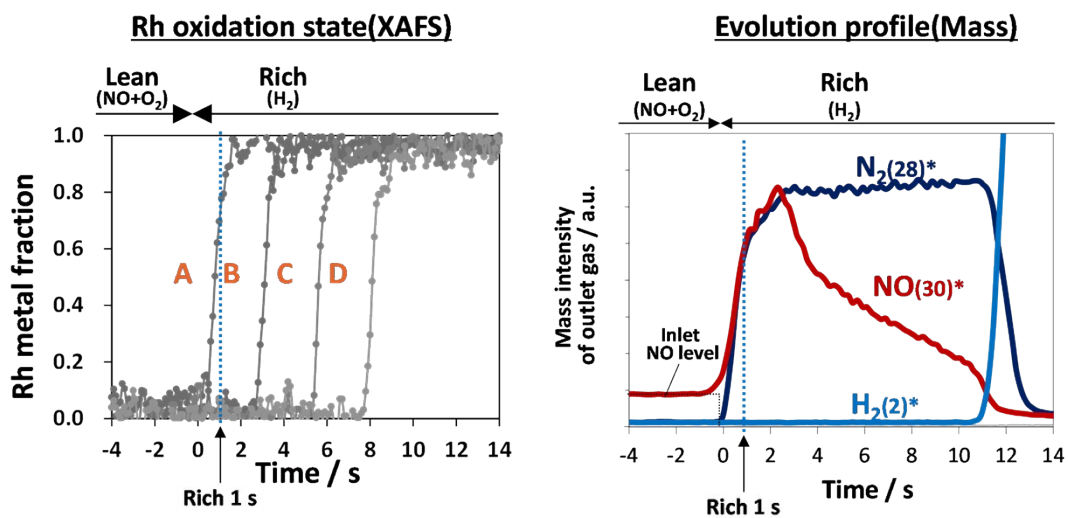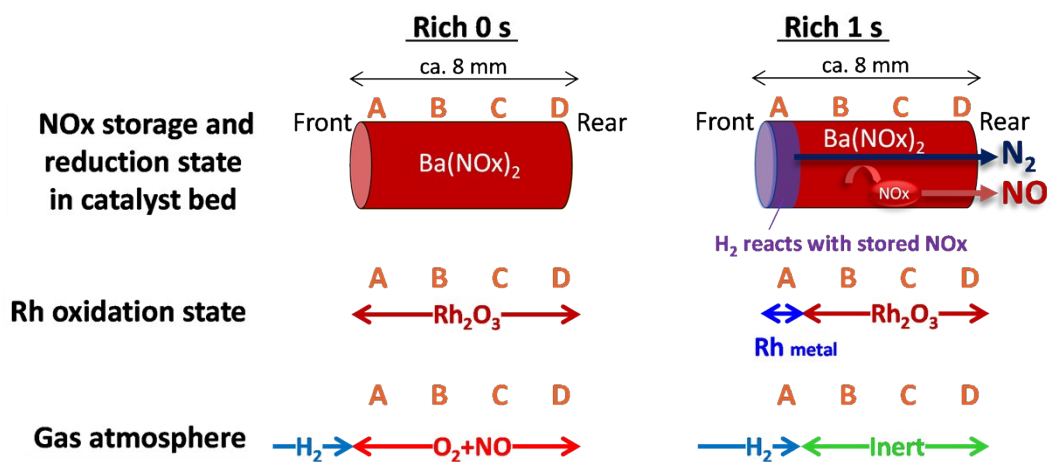

**Figure S6:** Schematic illustration of NO<sub>x</sub> storage and reduction behavior for the case of 100% NO<sub>x</sub> storage.

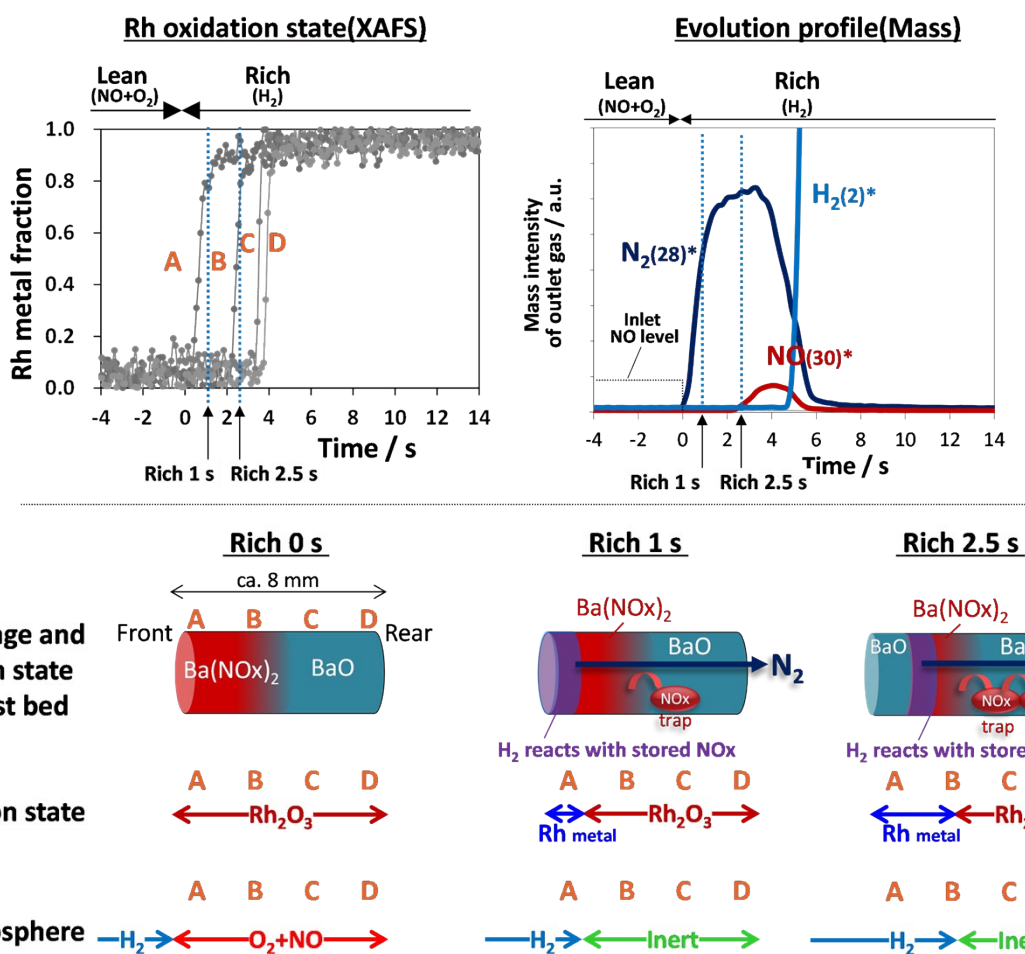

**Figure S7:** Schematic illustration of NO<sub>x</sub> storage and reduction behavior for the case of 33% NO<sub>x</sub> storage.
